# Supplementary material for: 4C-seq characterization of Drosophila BEAF binding regions provides evidence for highly variable long-distance interactions between active chromatin
Source: PubMed Central journal article supplement (PMC6152978; doi:10.1371/journal.pone.0203843), 2018-09-24
Supplement: pone.0203843.s002.pdf [file pone.0203843.s002.pdf]

# Chromosome Navigator

*D. melanogaster* Kc167 (dm3)

3R:7725004-7873523

Q

Fig S2-A

scs'

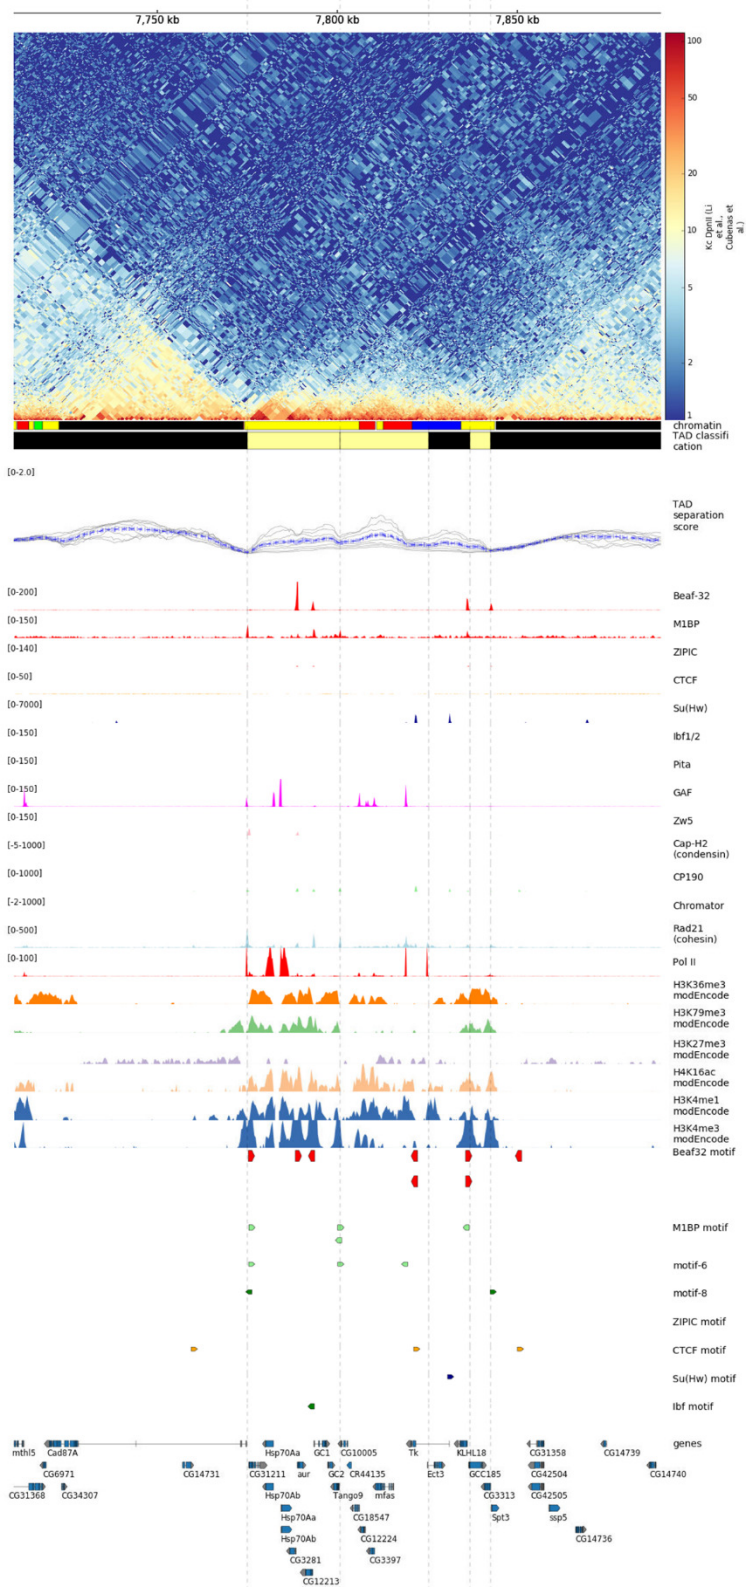

# Chromosome Navigator

*D. melanogaster* Kc167 (dm3)

2R:15233709-15362035

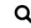

Fig S2-B

*hts*

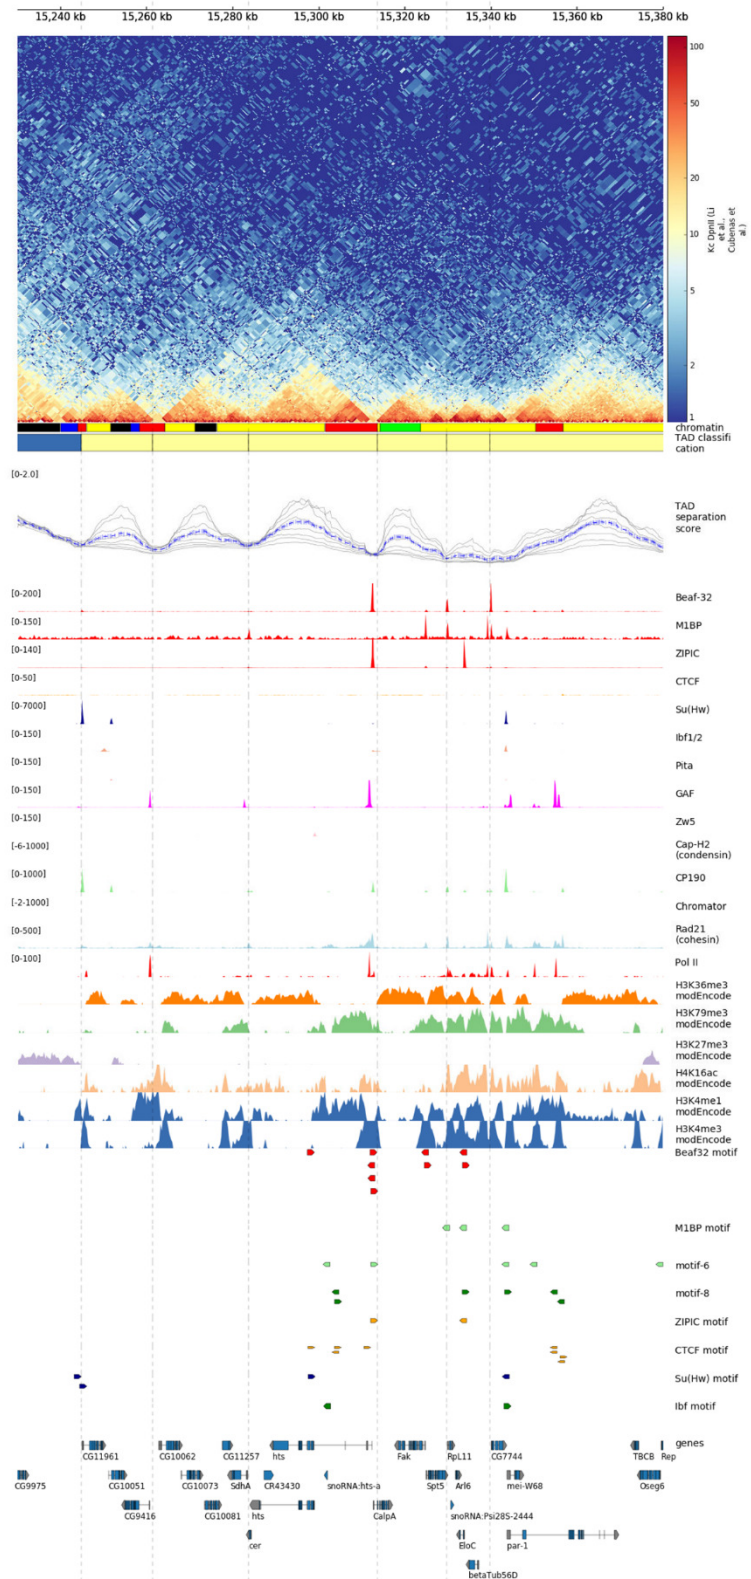

# Chromosome Navigator

*D. melanogaster* Kc167 (dm3)

X:5153253-5261457

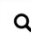

Fig S2-C

*snf*

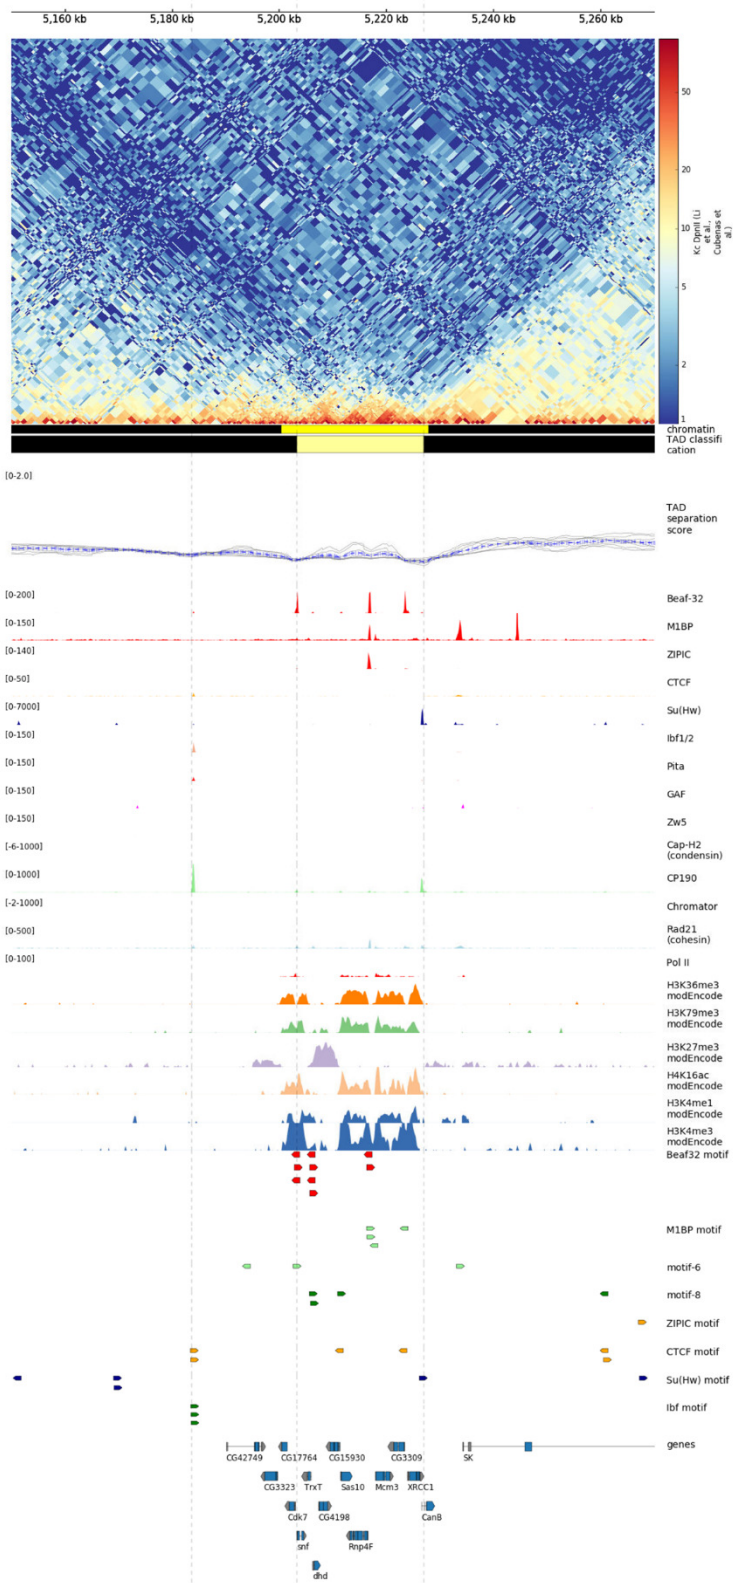

# Chromosome Navigator

*D. melanogaster* Kc167 (dm3)

X:7733023-7853056

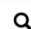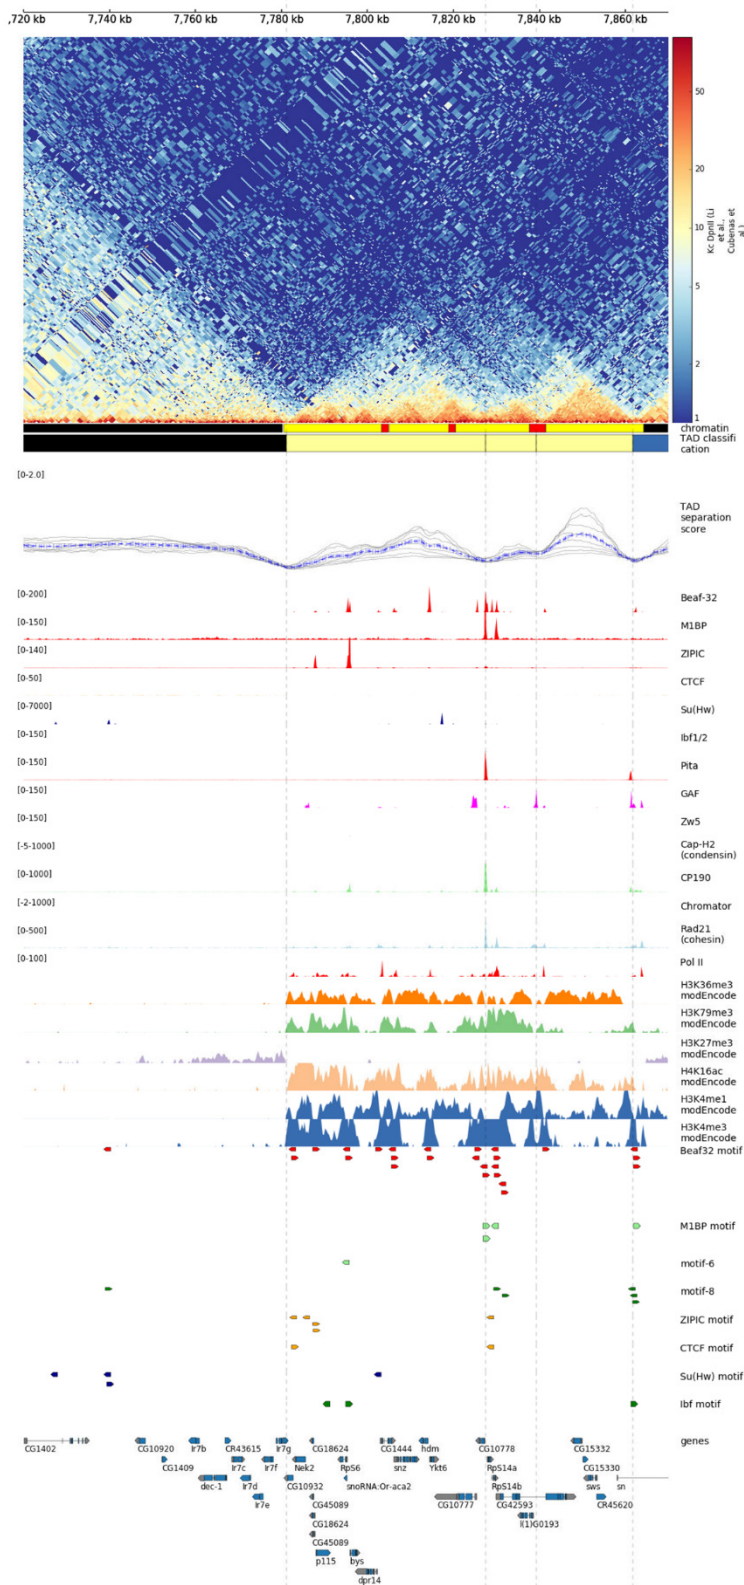

**Fig S2-D**  
**RpS6**

**S2 Fig: Chorogenome Navigator snapshots of 1 Mb regions around the viewpoints.**

Shown are the Hi-C maps, genome-wide mapping information for various insulator and other chromatin proteins (BEAF, M1BP, ZIPIC, dCTCF, Su(Hw), Ibf1/2, Pita, GAF, Zw5, condensin Cap-H2, CP190, Chromator, cohesion Rad21, Pol II) and histone modifications (H3K36me3, H3K79me3, H3K27me3, H4K16ac, H3K4me1, H3K4me3), binding site motif locations (BEAF, M1BP, motif-6, motif-8, ZIPIC, dCTCF, Su(Hw), Ibf) and gene models around the **(A)** *scs'* viewpoint (*CG3281* and *aur* genes); **(B)** *hts* viewpoint (*hts* and *CalpA* genes); **(C)** *snf* viewpoint (*Ckd7* and *snf* genes); and **(D)** *RpS6* viewpoint (*RpS6* and *bys* genes). See Chorogenome Navigator (<http://chorogenome.ie-freiburg.mpg.de/>) [52] for details.
