# Supplementary material for: 4C-seq characterization of Drosophila BEAF binding regions provides evidence for highly variable long-distance interactions between active chromatin
Source: PubMed Central journal article supplement (PMC6152978; doi:10.1371/journal.pone.0203843), 2018-09-24
Supplement: pone.0203843.s003.pdf [file pone.0203843.s003.pdf]

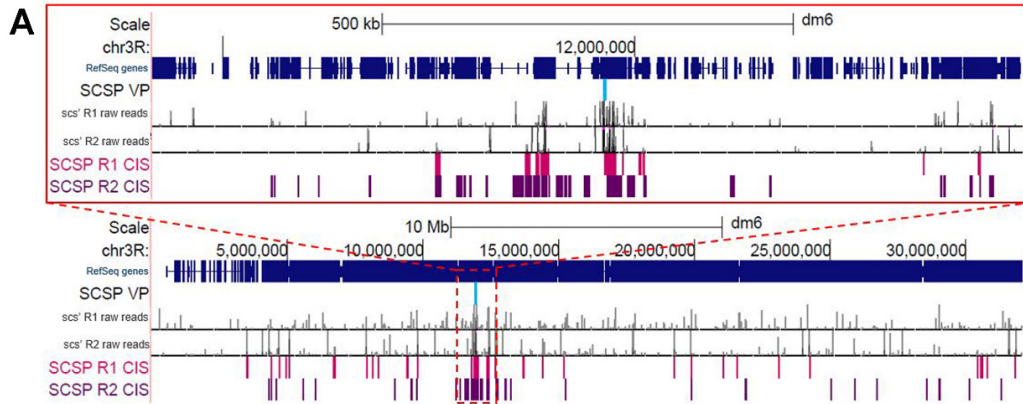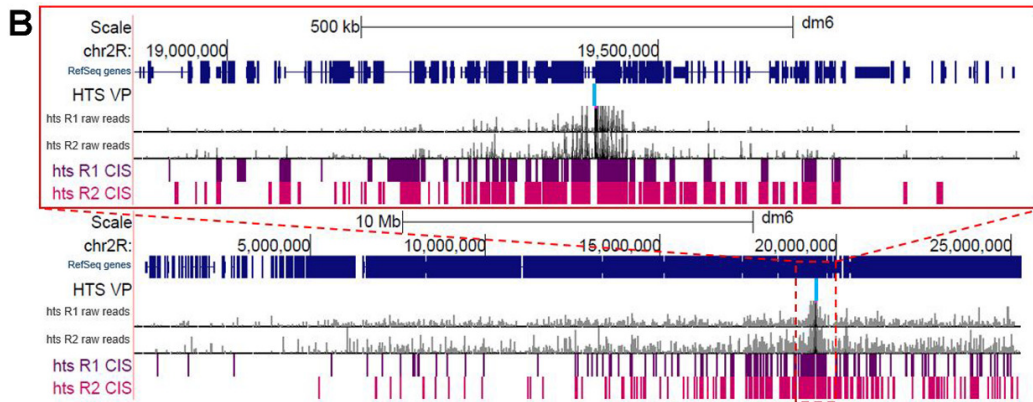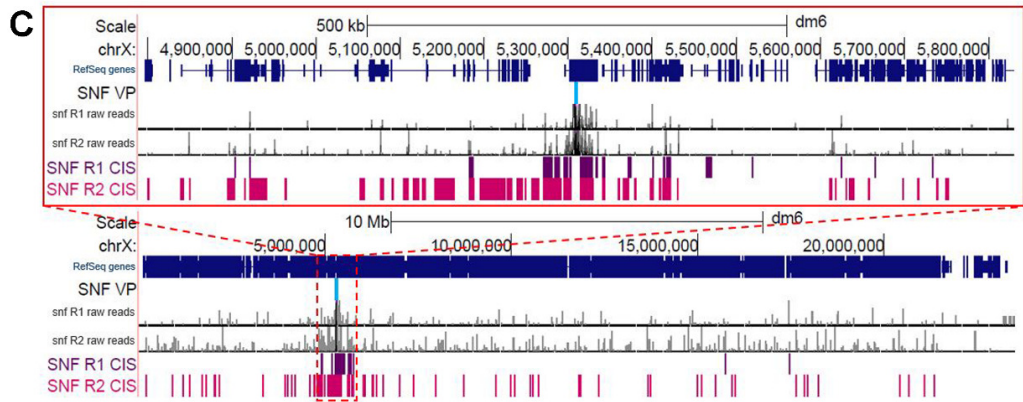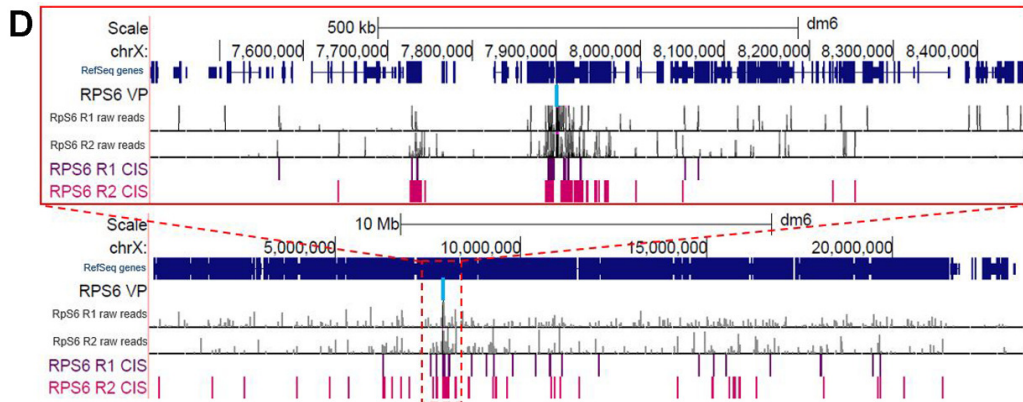

**S3 Fig: 4C interaction and read distributions along the chromosome arms of the viewpoints.** Shown are 1 Mb regions centered on the viewpoints (top of each panel) and the entire chromosome arms containing the viewpoints (bottom of each panel), as in Fig 2. The locations of sequence reads and 4C interactions are indicated for replicates R1 and R2. Note that the y-axes for read tracks are set so that reads can be seen for regions with lower counts. Most regions with off-scale read counts are near viewpoints. The highest read densities are around the (A) *scs*' viewpoint, (B) *hts* viewpoint, (C) *snf* viewpoint, and (D) *RpS6* viewpoint for both biological replicates, as is typical of 4C studies.
