# Supplementary material for: 4C-seq characterization of Drosophila BEAF binding regions provides evidence for highly variable long-distance interactions between active chromatin
Source: PubMed Central journal article supplement (PMC6152978; doi:10.1371/journal.pone.0203843), 2018-09-24
Supplement: pone.0203843.s004.pdf [file pone.0203843.s004.pdf]

**S1 Table.**

Primers for checking restriction digestion efficiency while making 4C libraries, and inverse PRC primers for making 4C libraries.

| Viewpoint                                     | Chr | Primer name                                                              | Primer sequence                                                                                                                                                                                                                                                  |
|-----------------------------------------------|-----|--------------------------------------------------------------------------|------------------------------------------------------------------------------------------------------------------------------------------------------------------------------------------------------------------------------------------------------------------|
| <b>4C restriction digestion check primers</b> |     |                                                                          |                                                                                                                                                                                                                                                                  |
| scs'                                          | 3R  | scs'_cut_L5<br>scs'_cut_L3<br>scs'_cut_R5<br>scs'_cut_R3                 | ATGATGCCGAATCATGGACACACC<br>TCGCTGTTGGGCTGTATCACAAT<br>TGACACAGATGCATAGGCAGATTTGG<br>CGCTTCACAATTCAAACGAACGGC                                                                                                                                                    |
| hts                                           | 2R  | hts_cut_L5<br>hts_cut_L3<br>hts_cut_R5<br>hts_cut_R3                     | CTGTAGTTTCGCCACTGTCTATGAAGC<br>CAGTGAGTGTGACCGTTGTATTTGTGAC<br>GGACAGGAGTTCCTCAATGCAGC<br>ATTGTCTCATAGTCCTGCACCTCGG                                                                                                                                              |
| snf                                           | X   | snf_cut_L5<br>snf_cut_L3<br>snf_cut_R5<br>snf_cut_R3                     | AGCCAATGATATTCTCGTGCTGCAG<br>GGAACGCTATGCCAAGCTATCCT<br>GACAGGATGGAGATGCTACCCAAC<br>TGGGATACTCACTTCTTCTCATCGGTACC                                                                                                                                                |
| RpS6                                          | X   | RpS6_cut_L5<br>RpS6_cut_L3<br>RpS6_cut_R5<br>RpS6_cut_R3                 | CATCTTTGGAACGTAATCCAATCACA<br>GGCAACGACAAGCAGGGATT<br>CACGAGAATGGAGATAATTGCACTGATTC<br>ATTGTAATCACTACACGTGCTGCAAC                                                                                                                                                |
| <b>4C library primers</b>                     |     |                                                                          |                                                                                                                                                                                                                                                                  |
| scs'                                          | 3R  | scs'_inverse_L5<br>scs'_inverse_L3<br>scs'_inverse_R5<br>scs'_inverse_R3 | CCTCTCTATGGGCAGTCGGTGATCACAGCTGTTCTGGTTCACAGTCAC<br>CCATCTCATCCCTGCGTGTCTCCGACTCAGTCTAACGGACGATATGATGCCGAATCATGGACACACC<br>CCATCTCATCCCTGCGTGTCTCCGACTCAGTTGGAGTGTGATCGCTTCACAATTCAAACGAACGGC<br>CCTCTCTATGGGCAGTCGGTGATGATTAACCGGACGATAGACTATCGGAAGATA          |
| hts                                           | 2R  | hts_inverse_L5<br>hts_inverse_L3<br>hts_inverse_R5<br>hts_inverse_R3     | CCTCTCTATGGGCAGTCGGTGATCGTACTACGATTTTGTAGGGATGGACAAACC<br>CCATCTCATCCCTGCGTGTCTCCGACTCAGTTCGTGATTCCGATCAGTGAGTGTGACCGTTGTATTTGTGAC<br>CCATCTCATCCCTGCGTGTCTCCGACTCAGTTCGATAACGATGGACAGGAGTTCCTCAATGCAGC<br>CCTCTCTATGGGCAGTCGGTGATTGGAGACAAGAATGTCTCGGTTCCG      |
| snf                                           | X   | snf_inverse_L5<br>snf_inverse_L3<br>snf_inverse_R5<br>snf_inverse_R3     | CCTCTCTATGGGCAGTCGGTGATGCAAAAACAGCGTATTGCTCCTTTATTGC<br>CCATCTCATCCCTGCGTGTCTCCGACTCAGTAAGGTAACGATGGAACGCTATGCCAAGCTATCCT<br>CCATCTCATCCCTGCGTGTCTCCGACTCAGTAAGGAGAACGATGACAGGATGGAGATGCTACCCAAC<br>CCTCTCTATGGGCAGTCGGTGATGGTGTGTTGGCAGTGTGTTAAACTGC            |
| RpS6                                          | X   | RpS6_inverse_L5<br>RpS6_inverse_L3<br>RpS6_inverse_R5<br>RpS6_inverse_R3 | CCTCTCTATGGGCAGTCGGTGATGTCGAATTGCAGCGGAGATAATATCATCCA<br>CCATCTCATCCCTGCGTGTCTCCGACTCAGTGAGCGGAACGATGGCGGCAACGACAAGCAGG<br>CCATCTCATCCCTGCGTGTCTCCGACTCAGCTGACCGAACGATACACGAGAATGGAGATAATTGCACTGATTC<br>CCTCTCTATGGGCAGTCGGTGATCGAGTGTATTTTCGTACTTATTTGGCATAATTC |
