# Supplementary material for: 4C-seq characterization of Drosophila BEAF binding regions provides evidence for highly variable long-distance interactions between active chromatin
Source: PubMed Central journal article supplement (PMC6152978; doi:10.1371/journal.pone.0203843), 2018-09-24
Supplement: pone.0203843.s005.pdf [file pone.0203843.s005.pdf]

**S2 Table.**

Virtual 4C analysis of viewpoints using the indicated Hi-C data.

See Table 1 for details.

| Viewpoint                                               | Number of <i>cis</i> interactions | Common <i>cis</i> - interactions (%) | Common interactions that are near- <i>cis</i> (%) | Unique interactions that are near- <i>cis</i> (%) | Number of <i>trans</i> - interactions | Common <i>trans</i> - interactions (%) |
|---------------------------------------------------------|-----------------------------------|--------------------------------------|---------------------------------------------------|---------------------------------------------------|---------------------------------------|----------------------------------------|
| Kc cells: El-Sharnouby et al. 2017 PLoS One 12:e0172725 |                                   |                                      |                                                   |                                                   |                                       |                                        |
| scs'_R1                                                 | 337                               | 32                                   | 95                                                | 34                                                | 87                                    | 0                                      |
| scs'_R2                                                 | 333                               | 33                                   | 95                                                | 29                                                | 112                                   | 0                                      |
| hts_R1                                                  | 427                               | 30                                   | 84                                                | 19                                                | 317                                   | 17                                     |
| hts_R2                                                  | 421                               | 31                                   | 84                                                | 21                                                | 308                                   | 16                                     |
| snf_R1                                                  | 367                               | 39                                   | 96                                                | 40                                                | 101                                   | 0                                      |
| snf_R2                                                  | 396                               | 36                                   | 96                                                | 35                                                | 137                                   | 0                                      |
| RpS6_R1                                                 | 364                               | 27                                   | 87                                                | 30                                                | 127                                   | 1                                      |
| RpS6_R2                                                 | 305                               | 32                                   | 87                                                | 34                                                | 115                                   | 1                                      |
| S2 cells: Szabo et al. 2018 Sci. Adv. 4:eaar8082        |                                   |                                      |                                                   |                                                   |                                       |                                        |
| scs'_R1                                                 | 842                               | 46                                   | 77                                                | 14                                                | 182                                   | 4                                      |
| scs'_R2                                                 | 1174                              | 33                                   | 77                                                | 24                                                | 464                                   | 2                                      |
| hts_R1                                                  | 1446                              | 49                                   | 42                                                | 11                                                | 206                                   | 2                                      |
| hts_R2                                                  | 2094                              | 34                                   | 42                                                | 20                                                | 793                                   | 1                                      |
| snf_R1                                                  | 771                               | 39                                   | 70                                                | 23                                                | 59                                    | 0                                      |
| snf_R2                                                  | 961                               | 32                                   | 70                                                | 34                                                | 282                                   | 0                                      |
| RpS6_R1                                                 | 401                               | 39                                   | 83                                                | 24                                                | 28                                    | 0                                      |
| RpS6_R2                                                 | 596                               | 26                                   | 83                                                | 39                                                | 187                                   | 0                                      |
| S2 cells: Wang et al. 2018 Nat. Commun. 9:188           |                                   |                                      |                                                   |                                                   |                                       |                                        |
| scs'_R1                                                 | 1097                              | 27                                   | 79                                                | 17                                                | 552                                   | 3                                      |
| scs'_R2                                                 | 533                               | 56                                   | 79                                                | 3                                                 | 194                                   | 8                                      |
| hts_R1                                                  | 1001                              | 20                                   | 65                                                | 12                                                | 407                                   | 2                                      |
| hts_R2                                                  | 487                               | 41                                   | 65                                                | 12                                                | 151                                   | 6                                      |
| snf_R1                                                  | 715                               | 18                                   | 71                                                | 19                                                | 197                                   | 2                                      |
| snf_R2                                                  | 297                               | 44                                   | 71                                                | 20                                                | 81                                    | 5                                      |
| RpS6_R1                                                 | 790                               | 22                                   | 68                                                | 16                                                | 225                                   | 2                                      |
| RpS6_R2                                                 | 420                               | 41                                   | 68                                                | 15                                                | 94                                    | 5                                      |

Cubenas-Potts et al. 2017 Nucleic Acids Res. 45:1714-30 (Kc cells) was also analyzed but gave only near-*cis* interactions and is not included in this table.
