# Supplementary material for: 4C-seq characterization of Drosophila BEAF binding regions provides evidence for highly variable long-distance interactions between active chromatin
Source: PubMed Central journal article supplement (PMC6152978; doi:10.1371/journal.pone.0203843), 2018-09-24
Supplement: pone.0203843.s006.pdf [file pone.0203843.s006.pdf]

**S3A Table.**

Primers for 3C validation of 4C interactions, and 3C results.

Primer name indicates if the 4C cis-interaction was unique to one or common to both 4C replicates.

\*: 3C positive control; previously reported interaction between scs' and scs.

\*\* : Region selected for FISH analysis.

| Viewpoint           | Primer name            | Chr                      | Primer sequence                    | Distance from viewpoint | 3C result |      |
|---------------------|------------------------|--------------------------|------------------------------------|-------------------------|-----------|------|
|                     |                        |                          |                                    |                         | Rep1      | Rep2 |
| scs'                | scs'_VP_5              | 3R                       | GTCACGATATTCTTCAACCAACCGATAGTATCGC | viewpoint               |           |      |
|                     | scs'_scs_common_cis_3* | 3R                       | ATCGTTTACGGTAGCCATTCTCACGT         | ~ 11 kb                 | +         | +    |
|                     | scs'_common_cis1_3     | 3R                       | TAATCTCCACCTGCCATTTG               | ~ 49 kb                 | +         | +    |
|                     | scs'_common_cis2_3     | 3R                       | CGAAGCAGACTCGCAATTA                | ~ 201 kb                | -         | -    |
|                     | scs'_common_cis3_3**   | 3R                       | CAACTCTCGCTCTCGTTTC                | ~ 203 kb                | +         | -    |
|                     | scs'_common_cis4_3     | 3R                       | CAGGAGAAGAAGGTGGTTAAG              | ~ 204 kb                | -         | -    |
|                     | scs'_common_cis5_3     | 3R                       | ACAGTGAACCTCGTCGTC                 | ~ 457 kb                | -         | -    |
|                     | scs'_common_cis6_3     | 3R                       | ACGTCCACCAGTCCCTTCAACAAT           | ~ 527 kb                | +         | +    |
|                     | scs'_common_cis7_3**   | 3R                       | CGAACTCCATTGTGAACAAGCTGATGG        | ~ 748 kb                | +         | +    |
|                     | scs'_common_cis8_3     | 3R                       | CCTCAAAATGAGATGTAGCCGT             | ~ 930 kb                | +         | -    |
|                     | scs'_unique_cis1_R1    | 3R                       | GCTGCTGCTAACTCAATTATAC             | ~ 1.28 Mb               | -         | +    |
|                     | scs'_unique_cis1_R2    | 3R                       | ATTGCCATTGCCGTTGTGCATCATATC        | ~ 2.46 Mb               | -         | +    |
|                     | scs'_unique_cis2_R2    | 3R                       | TGACTCACCGAAGCTTTATTC              | ~ 3.84 Mb               | -         | -    |
| scs'_unique_cis2_R1 | 3R                     | GCTTGTCACTCATCATTCTATC   | ~ 17.1 Mb                          | -                       | +         |      |
| hts                 | hts'_VP_5              | 2R                       | ATCTGAGGCGGCACCTTACACT             | viewpoint               |           |      |
|                     | hts'_common_cis1_3     | 2R                       | TAAGCTCCAGAGACGCTTTAGTGC           | ~ 62 kb                 | +         | -    |
|                     | hts'_common_cis2_3     | 2R                       | TGAATTTCCCAATGCCCAATCAACAGGT       | ~ 67 kb                 | +         | +    |
|                     | hts'_common_cis3_3     | 2R                       | GGGTTTCCTTATTGCAAGGG               | ~ 115 kb                | +         | -    |
|                     | hts'_common_cis4_3**   | 2R                       | TCACAATGGCCTTACATC                 | ~ 850 kb                | +         | +    |
|                     | hts'_common_cis5_3     | 2R                       | GCGCCACAAGAACCTTA                  | ~ 896 kb                | +         | +    |
|                     | hts'_common_cis6_3     | 2R                       | CTGTGTCTCAGTGCATAGAAG              | ~ 1.29 Mb               | +         | -    |
|                     | hts'_common_cis7_3     | 2R                       | CCTATTAAACGCGGTCAATCCT             | ~ 1.39 Mb               | -         | -    |
|                     | hts'_common_cis8_3     | 2R                       | CAATGTCGGCGTGTATGT                 | ~ 1.69 Mb               | -         | -    |
|                     | hts'_common_cis9_3     | 2R                       | CTTAACCGGCTTTGCCTT                 | ~ 1.73 Mb               | -         | -    |
|                     | hts'_unique_cis1_R2    | 2R                       | AATCCGAAGAACTTTGGCAATA             | ~ 3.45 Mb               | -         | -    |
|                     | hts'_common_cis10_3    | 2R                       | GCACCTTGCCGTAGGA                   | ~ 4.49 Mb               | -         | -    |
|                     | hts'_common_cis11_3    | 2R                       | CCGCATTCTGTTGTATTG                 | ~ 4.85 Mb               | -         | -    |
|                     | hts'_unique_cis1_R1    | 2R                       | CCGTGGTTCTCGGTGATAACAGCATAG        | ~ 5.47 Mb               | -         | -    |
|                     | hts'_unique_cis2_R2    | 2R                       | CTCGTACTTGCTATCCAGTCCAGTA          | ~ 11.2 Mb               | -         | +    |
|                     | hts'_unique_cis2_R1    | 2R                       | GTTATGGTGATTATTGGTAGATTCCG         | ~ 12.8 Mb               | -         | +    |
|                     | hts'_trans1_3          | X                        | GGAAAGACCGGTTATATCTG               | trans                   | +         | -    |
| hts'_trans2_3       | 3L                     | GTTGATAGTAGCCCGGTTGA     | trans                              | -                       | -         |      |
| hts'_trans3_3       | 2L                     | TGCACTCCTCAGAACATAAAC    | trans                              | +                       | -         |      |
| snf                 | snf'_VP_5              | X                        | CACCGGTGCGATAACATATCGATAGACC       | viewpoint               |           |      |
|                     | snf'_common_cis1_3     | X                        | AATGGTGGACGATTGGG                  | ~ 7 kb                  | +         | -    |
|                     | snf'_common_cis2_3     | X                        | AACGGTTGAAGCATGGAC                 | ~ 14 kb                 | +         | +    |
|                     | snf'_common_cis3_3     | X                        | CTAAGTGAGCACAGCCACA                | ~ 105 kb                | +         | -    |
|                     | snf'_common_cis4_3     | X                        | ATGCCGAGCATAAGTGCCTCTGTG           | ~ 112 kb                | +         | +    |
|                     | snf'_common_cis5_3     | X                        | GAAATCACCACCGACGT                  | ~ 231 kb                | -         | -    |
|                     | snf'_common_cis6_3     | X                        | GCAACACAAGCAACATACAACCTGTGGT       | ~ 370 kb                | +         | +    |
|                     | snf'_common_cis7_3**   | X                        | GTAATACGGCTCCTGCATGA               | ~ 405 kb                | +         | -    |
|                     | snf'_unique_cis1_R2    | X                        | GCTATCCATTAAACCAACTCCCGAGCGA       | ~ 1.21 Mb               | -         | +    |
|                     | snf'_common_cis8_3     | X                        | GCAGATTATGTTTGGCTTGTG              | ~ 4.75 Mb               | -         | -    |
|                     | snf'_unique_cis2_R2    | X                        | ATGTACATACATCCATCCATTCCG           | ~ 6.51 Mb               | -         | +    |
|                     | snf'_common_cis9_3     | X                        | CCAATAAGCGCATTCTACACA              | ~ 9.49 Mb               | -         | -    |
|                     | snf'_unique_cis1_R1    | X                        | GTGCCTTCTCGAATCCATCGGTCA           | ~ 10.4 Mb               | -         | -    |
|                     | snf'_unique_cis2_R1    | X                        | ATCGAATCGTTTCATTGTTGTG             | ~ 12.1 Mb               | -         | +    |
|                     | snf'_trans1_3          | 3L                       | TTCGCTCCACTTGAACCTGTGCT            | trans                   | +         | +    |
| snf'_trans2_3       | 2L                     | ACTGAGTCTAGGAAATATGAAACC | trans                              | -                       | -         |      |
| snf'_trans3_3       | 2R                     | GCTGACCCATGAAGCTCCACTT   | trans                              | -                       | -         |      |
| RpS6                | RpS6'_VP_5             | X                        | GACCGATAGGAGGAAGTAGAGATGACAGAT     | viewpoint               |           |      |
|                     | RpS6'_common_cis1_3    | X                        | ATCCCGTCGATCCTCCAGGA               | ~ 7 kb                  | +         | +    |
|                     | RpS6'_common_cis2_3    | X                        | ACCGCTAAACCAATGTCCAAGTCATCGT       | ~ 9 kb                  | +         | +    |
|                     | RpS6'_common_cis3_3    | X                        | ATACGATCGGAAGAGCGATG               | ~ 10 kb                 | +         | +    |
|                     | RpS6'_common_cis4_3    | X                        | GCTATACATTACTTATCTGGAAAGG          | ~ 13 kb                 | +         | +    |
|                     | RpS6'_common_cis5_3    | X                        | GTGTTTAGGATCTCGACCAGTG             | ~ 14 kb                 | +         | +    |
|                     | RpS6'_common_cis6_3    | X                        | GTATAAACAGCACCGGCACTGCT            | ~ 142 kb                | +         | -    |
|                     | RpS6'_common_cis7_3    | X                        | CACAAATCTATGCATTACATCCC            | ~ 167 kb                | +         | -    |
|                     | RpS6'_common_cis8_3    | X                        | CCCAAATCCTGATGATCCTTATC            | ~ 172 kb                | -         | -    |
|                     | RpS6'_common_cis9_3    | X                        | AAGTCCGTTGCTTCTTCTC                | ~ 1.61 Mb               | -         | -    |
|                     | RpS6'_common_cis10_3** | X                        | CGATAAACAGAGCACCAAAGA              | ~ 3.05 Mb               | +         | +    |
|                     | RpS6'_unique_cis1_R2   | X                        | GCACAACAAAGGACTAGAAGTA             | ~ 3.05 Mb               | -         | +    |
|                     | RpS6'_unique_cis1_R1   | X                        | CAATCGGCAATTCTATTGTTGA             | ~ 3.20 Mb               | -         | +    |
|                     | RpS6'_common_cis11_3   | X                        | TAGTGTGAGCACTTGGCTGTCCACA          | ~ 5.05 Mb               | -         | -    |
|                     | RpS6'_common_cis12_3   | X                        | GTAATACTTGTAGCCAGAACCAACAGCAG      | ~ 6.15 Mb               | +         | +    |
|                     | RpS6'_unique_cis2_R1   | X                        | CTACTATTGTCGACCACTGTGCGAT          | ~ 7.58 Mb               | -         | +    |
|                     | RpS6'_unique_cis2_R2   | X                        | CTCGTGCATCACCTCCAGCAGATA           | ~ 11.8 Mb               | -         | +    |
|                     | RpS6'_trans1_3         | 2L                       | CACCTCAGGTTATAAAATCCACTCAAGGCAAA   | trans                   | -         | -    |
|                     | RpS6'_trans2_3         | 2L                       | TACTTGGCTGACTCCGG                  | trans                   | +         | -    |
|                     | RpS6'_trans3_3         | 3L                       | GATCATTAGCACTAGCAATTAGTCTGCGC      | trans                   | +         | +    |

**S3B Table: 3C cross-check.**

Primers for 3C validation of 4C interactions, and 3C results.

Primer name indicates if the 4C cis-interaction was unique to one or common to both 4C replicates.

\*: 3C positive control; previously reported interaction between scs' and scs.

\*\* : Region selected for FISH analysis.

| 3C viewpoint cross-check: viewpoint, primer name, chr, sequence, original viewpoint interaction, and results |                    |                    |                                 |                         |           |      |
|--------------------------------------------------------------------------------------------------------------|--------------------|--------------------|---------------------------------|-------------------------|-----------|------|
| Viewpoint                                                                                                    | Primer name        | Chr                | Primer sequence                 | Distance from viewpoint | 3C result |      |
|                                                                                                              |                    |                    |                                 |                         | Rep1      | Rep2 |
| scs'                                                                                                         | hts_common_cis1_3  | 2R                 | TAAGCTCCAGAGAACGCTTTAGTGC       | hts                     | -         | -    |
|                                                                                                              | hts_common_cis2_3  | 2R                 | TGAATTTCCCAATGCCCAATCAACAGGT    | hts                     | -         | -    |
|                                                                                                              | snf_common_cis4_3  | X                  | ATGCCGAGCATAAGTGCCTGTGTG        | snf                     | -         | -    |
|                                                                                                              | snf_common_cis6_3  | X                  | GCAACACAAGCAACATACAACCTGTGGT    | snf                     | -         | -    |
|                                                                                                              | snf_trans3_3       | 2R                 | GCTGACCCATGAAGCTCCACTT          | snf                     | -         | -    |
|                                                                                                              | RpS6_common_cis1_3 | X                  | ATCCCGTCGATCCTCCAGGA            | RpS6                    | -         | -    |
|                                                                                                              | RpS6_common_cis2_3 | X                  | ACCGCTAAACCAATGTCCAAGTCATCGT    | RpS6                    | -         | -    |
|                                                                                                              | RpS6_trans3_3      | 3L                 | GATCATTAGCACTAGCAATTAGCTGCGC    | RpS6                    | -         | -    |
| hts                                                                                                          | scs'_common_cis6_3 | 3R                 | ACGTCCACCAGTCCCTTCACAAT         | scs'                    | -         | -    |
|                                                                                                              | scs'_common_cis7_3 | 3R                 | CGAACTCCATTGTGAACAAGCTGATGG     | scs'                    | -         | -    |
|                                                                                                              | snf_common_cis4_3  | X                  | ATGCCGAGCATAAGTGCCTGTGTG        | snf                     | -         | -    |
|                                                                                                              | snf_common_cis6_3  | X                  | GCAACACAAGCAACATACAACCTGTGGT    | snf                     | -         | -    |
|                                                                                                              | snf_trans3_3       | 2R                 | GCTGACCCATGAAGCTCCACTT          | snf                     | -         | -    |
|                                                                                                              | RpS6_common_cis1_3 | X                  | ATCCCGTCGATCCTCCAGGA            | RpS6                    | -         | -    |
|                                                                                                              | RpS6_common_cis2_3 | X                  | ACCGCTAAACCAATGTCCAAGTCATCGT    | RpS6                    | -         | -    |
|                                                                                                              | RpS6_trans3_3      | 3L                 | GTAATACTTTGTAGCCAGAACACAACAGCAG | RpS6                    | -         | -    |
| snf                                                                                                          | scs'_common_cis6_3 | 3R                 | ACGTCCACCAGTCCCTTCACAAT         | scs'                    | -         | -    |
|                                                                                                              | scs'_common_cis7_3 | 3R                 | CGAACTCCATTGTGAACAAGCTGATGG     | scs'                    | -         | -    |
|                                                                                                              | hts_common_cis1_3  | 2R                 | TAAGCTCCAGAGAACGCTTTAGTGC       | hts                     | -         | -    |
|                                                                                                              | hts_common_cis2_3  | 2R                 | TGAATTTCCCAATGCCCAATCAACAGGT    | hts                     | -         | -    |
|                                                                                                              | RpS6_common_cis1_3 | X                  | ATCCCGTCGATCCTCCAGGA            | RpS6                    | -         | -    |
|                                                                                                              | RpS6_common_cis2_3 | X                  | ACCGCTAAACCAATGTCCAAGTCATCGT    | RpS6                    | -         | -    |
|                                                                                                              | RpS6_trans3_3      | 3L                 | GTAATACTTTGTAGCCAGAACACAACAGCAG | RpS6                    | -         | -    |
|                                                                                                              | RpS6               | scs'_common_cis6_3 | 3R                              | ACGTCCACCAGTCCCTTCACAAT | scs'      | -    |
| scs'_common_cis7_3                                                                                           |                    | 3R                 | CGAACTCCATTGTGAACAAGCTGATGG     | scs'                    | -         | -    |
| hts_common_cis1_3                                                                                            |                    | 2R                 | TAAGCTCCAGAGAACGCTTTAGTGC       | hts                     | -         | -    |
| hts_common_cis2_3                                                                                            |                    | 2R                 | TGAATTTCCCAATGCCCAATCAACAGGT    | hts                     | -         | -    |
| snf_common_cis4_3                                                                                            |                    | X                  | ATGCCGAGCATAAGTGCCTGTGTG        | snf                     | -         | -    |
| snf_common_cis6_3                                                                                            |                    | X                  | GCAACACAAGCAACATACAACCTGTGGT    | snf                     | -         | -    |
| snf_trans3_3                                                                                                 |                    | 2R                 | GCTGACCCATGAAGCTCCACTT          | snf                     | -         | -    |
