# Supplementary material for: 4C-seq characterization of Drosophila BEAF binding regions provides evidence for highly variable long-distance interactions between active chromatin
Source: PubMed Central journal article supplement (PMC6152978; doi:10.1371/journal.pone.0203843), 2018-09-24
Supplement: pone.0203843.s007.pdf [file pone.0203843.s007.pdf]

**S4 Table.**

Primers for preparing FISH probes.

| Viewpoint        | Primer name                                                                                                                                                                      | Chr | Start    | End      | Primer sequence                                                                                                                                                                                                                                                                                        | Distance from the viewpoint |
|------------------|----------------------------------------------------------------------------------------------------------------------------------------------------------------------------------|-----|----------|----------|--------------------------------------------------------------------------------------------------------------------------------------------------------------------------------------------------------------------------------------------------------------------------------------------------------|-----------------------------|
| scs'_viewpoint   | 5' Primer_1<br>3' Primer_1<br>5' Primer_2<br>3' Primer_2<br>5' Primer_3<br>3' Primer_3<br>5' Primer_4<br>3' Primer_4                                                             | 3R  | 11959448 | 11968943 | GATCTTAAGGTCGTGGACTG<br>TCGTGACTTTGTAGTGTAGAA<br>TGTTCTGTAGTTGTGCGAGTG<br>AACCCATTTTCGCTAGAGATTAG<br>ACTGCTAATTCGGGACTAATAA<br>CAACTGCAACTATGTACCTAAAG<br>AATCTTGTGCTCACCATCG<br>GCGGCACCTAACAGTAAAT                                                                                                   | -                           |
| scs'_cis_750kb   | 5' Primer_1<br>3' Primer_1<br>5' Primer_2<br>3' Primer_2<br>5' Primer_3<br>3' Primer_3<br>5' Primer_4<br>3' Primer_4                                                             | 3R  | 12707806 | 12714806 | CGACTTTCGAACAGCTCATA<br>GGTAAACGAAACACCCATAAAC<br>CTGCAACACATTGAAGCAATA<br>GGCGAACTCCATTGTGAA<br>CCACATGAAGGCTCTCAAA<br>TCAGGCTTACACTTAACTACAC<br>TGGCTGAAATCGCTAAC<br>GGCAAACTGTCCCTGTATA                                                                                                             | ~ 750 kbp                   |
| scs'_cis_200kb   | 5' Primer_1<br>3' Primer_1<br>5' Primer_2<br>3' Primer_2<br>5' Primer_3<br>3' Primer_3<br>5' Primer_5<br>3' Primer_5                                                             | 3R  | 11756973 | 11763773 | TAGCCGGGCGACTATTTA<br>CCGCAAATGGCAACTTATT<br>TAAGAGCTGTGACGGCAGAA<br>GCAGGCTTCTAACTACGTACATATC<br>TAATTGCGAGTGTCTGTTCCG<br>AGAGACGGCACTAGTATCTCG<br>CTTGACAAGCAGATTAGAAATTAGG<br>TGAACGATTCCAACAGAAG                                                                                                   | ~ 200 kbp                   |
| hts'_viewpoint   | 5' Primer_1<br>3' Primer_1<br>5' Primer_2<br>3' Primer_2<br>5' Primer_3<br>3' Primer_3<br>5' Primer_4<br>3' Primer_4                                                             | 2R  | 19423624 | 19426142 | ACCAACGAGTCACGTCTAA<br>CGGTGAGTATCTTGCATCTAC<br>CACTCACTGTATGTGTAGAGG<br>TCGTCAATAGGCACTGTATTT<br>GGTTTCGCCGTAGAATTA<br>TTCTGGCTGCGGAAATAG<br>GAGAACTATGCTGTATCTTCC<br>CAGGAATGTGTAGAGGGTAAAG                                                                                                          | -                           |
| hts'_cis_850kb   | 5' Primer_1<br>3' Primer_1<br>5' Primer_2<br>3' Primer_2<br>5' Primer_3<br>3' Primer_3<br>5' Primer_4<br>3' Primer_4                                                             | 2R  | 20271926 | 20278427 | TGCAAATATCGAGTAAGAGGG<br>CGTTAATCAAACGCAAGTACAG<br>TGATCAGAGACCACCAAGTA<br>TTCCAGTTCATCCTCCGT<br>GTCAGTTCATGGAGGGATTG<br>TGCCAACTATGATCCAGAAG<br>GGATGGCGCTGAATAAAGTAGTAAAG<br>AATCCAGACAGAGAGCGCAA                                                                                                    | ~ 850 kb                    |
| snf'_viewpoint   | 5' Primer_5<br>3' Primer_5<br>5' Primer_1<br>3' Primer_1<br>5' Primer_2<br>3' Primer_2<br>5' Primer_3<br>3' Primer_3                                                             | X   | 5303600  | 5312600  | GATTCCTACGCAACTGACGA<br>CAATCAGATACGCCAGTTAGAT<br>AGCCATCTAGTTGATCCTAGT<br>GTGCACGCTACCGTATTT<br>TCGCTCGCTTTCATCAC<br>AAGGAGCAATACGCTGTTT<br>GGTGCATAACATATCGATAGAC<br>CGAGGACTTGTGGGACTT                                                                                                              | -                           |
| snf'_cis_404kb   | 5' Primer_1<br>3' Primer_1<br>5' Primer_2<br>3' Primer_2<br>5' Primer_3<br>3' Primer_3<br>5' Primer_5<br>3' Primer_5                                                             | X   | 4900951  | 4907451  | GGCCAGAAAGCAAATATAGGG<br>CACCCTACCCTGGTTAGAA<br>CTTGCAACCAGATTGATTTATGC<br>AACCAACCAACCGATCCAA<br>TGCACGGCCTGAGTATTT<br>TGGCAACAACTAAGTGAATA<br>GCCGCATGAGTGGAATTT<br>CCATCAACTGCCAAGATCAG                                                                                                             | ~ 404 kbp                   |
| RpS6'_viewpoint  | 5' Primer_1<br>3' Primer_1<br>5' Primer_2<br>3' Primer_2<br>5' Primer_3<br>3' Primer_3<br>5' Primer_4<br>3' Primer_4                                                             | X   | 7897240  | 7906240  | CGCGGTGTTACTTCTTGT<br>TGTCATCTCACTTCCCTCTATC<br>GTGCTCACGGCGATATTTA<br>AGTGCAGGACGGGAATA<br>GCTGAAGATCTGTGAGATGG<br>CGATCAAGAACAAGAAGCAAAT<br>GTATTTACCCATTGGTCCGA<br>TGATATCATTGCAAGTGTCAAG                                                                                                           | -                           |
| RpS6'_cis_3054kb | 5' Primer_1<br>3' Primer_1<br>5' Primer_2<br>3' Primer_2<br>5' Primer_3<br>3' Primer_3<br>5' Primer_4<br>3' Primer_4<br>5' Primer_5<br>3' Primer_5<br>5' Primer_6<br>3' Primer_6 | X   | 4841173  | 4853293  | CACACACACAGAGGTGATAAT<br>TTACACTGTTGGCACTTTA<br>CTGACTGCAAGCCATACATC<br>GGCACAGCCTATTGTCTTAAA<br>TATTTGATTTGCCCGCTTAC<br>CGATAAACAGAGCACCAAAGA<br>TGGAGAGCATCGTCTTATAAAT<br>CACAAACAAACGAGAGACATAG<br>GTGGAGAAGCACTAACACAC<br>AACTGATTTGCGATTGAATCAC<br>TGACAGTGATTTCCCTCAATC<br>CTGACTCAATCGTCCATCTTT | ~ 3 million bp              |
