# Supplementary material for: 4C-seq characterization of Drosophila BEAF binding regions provides evidence for highly variable long-distance interactions between active chromatin
Source: PubMed Central journal article supplement (PMC6152978; doi:10.1371/journal.pone.0203843), 2018-09-24
Supplement: pone.0203843.s008.pdf [file pone.0203843.s008.pdf]

**S5 Table.**

For each viewpoint replicate (R1, R2), the total number of reads after trimming off viewpoint sequences, the % that uniquely aligned to the Drosophila genome R6, the number of uniquely aligned reads that passed the filter, the % of filtered reads that were on the same chromosome arm as the viewpoint (% *cis* reads), % *cis* reads in significant 4C interactions, and the % of *trans* reads in significant 4C interactions are shown.

| <b>Viewpoint</b> | <b>Trimmed reads</b> | <b>% uniquely aligned</b> | <b>Filtered, uniquely aligned reads</b> | <b>% <i>cis</i> reads</b> | <b>% <i>cis</i> reads in significant 4C interactions</b> | <b>% <i>trans</i> reads in significant 4C interactions</b> |
|------------------|----------------------|---------------------------|-----------------------------------------|---------------------------|----------------------------------------------------------|------------------------------------------------------------|
| scs'_R1          | 53184162             | 64                        | 32388871                                | 39                        | 27                                                       | 15                                                         |
| scs'_R2          | 15459739             | 66                        | 9342247                                 | 31                        | 42                                                       | 56                                                         |
| hts_R1           | 2977423              | 70                        | 1763844                                 | 29                        | 49                                                       | 55                                                         |
| hts_R2           | 6810300              | 77                        | 5099405                                 | 40                        | 56                                                       | 48                                                         |
| snf_R1           | 5789427              | 84                        | 1989581                                 | 29                        | 30                                                       | 13                                                         |
| snf_R2           | 4504081              | 75                        | 2677886                                 | 31                        | 43                                                       | 27                                                         |
| RpS6_R1          | 3253656              | 73                        | 1420646                                 | 22                        | 14                                                       | 21                                                         |
| RpS6_R2          | 16325192             | 85                        | 2333122                                 | 31                        | 42                                                       | 23                                                         |
