# Supplementary material for: 4C-seq characterization of Drosophila BEAF binding regions provides evidence for highly variable long-distance interactions between active chromatin
Source: PubMed Central journal article supplement (PMC6152978; doi:10.1371/journal.pone.0203843), 2018-09-24
Supplement: pone.0203843.s009.pdf [file pone.0203843.s009.pdf]

**S6 Table.**

FISH nuclei count data, corresponding to Figure 4.

KOB: *BEAF[AB-KO]*, brain; KOW: *BEAF[AB-KO]*, wing disc;

WTB: BEAF wild type, brain; WTW: BEAF wild type, wing disc.

| Sample name             | Nuclei with colocalization | Total nuclei counted | % colocalization |
|-------------------------|----------------------------|----------------------|------------------|
| KOB_scs'_cis_750kb      | 96                         | 250                  | 38               |
| KOW_scs'_cis_750kb      | 111                        | 408                  | 27               |
| WTB_scs'_cis_750kb      | 92                         | 396                  | 23               |
| WTW_scs'_cis_750kb      | 95                         | 282                  | 34               |
| KOB_scs'_cis_200kb      | 93                         | 261                  | 36               |
| KOW_scs'_cis_200kb      | 45                         | 240                  | 19               |
| WTB_scs'_cis_200kb      | 81                         | 345                  | 23               |
| WTW_scs'_cis_200kb      | 93                         | 525                  | 18               |
| KOB_hts_cis_850kb       | 31                         | 135                  | 23               |
| KOW_hts_cis_850kb       | 66                         | 179                  | 37               |
| WTB_hts_cis_850kb       | 41                         | 131                  | 31               |
| WTW_hts_cis_850kb       | 37                         | 136                  | 27               |
| KOB_hts_trans_neg       | 22                         | 382                  | 6                |
| KOW_hts_trans_neg       | 16                         | 199                  | 8                |
| WTB_hts_trans_neg       | 17                         | 187                  | 9                |
| WTW_hts_trans_neg       | 6                          | 369                  | 2                |
| KOB_snf_cis_404kb       | 70                         | 332                  | 21               |
| KOW_snf_cis_404kb       | 48                         | 296                  | 16               |
| WTB_snf_cis_404kb       | 91                         | 228                  | 40               |
| WTW_snf_cis_404kb       | 74                         | 298                  | 25               |
| KOB_snf_cis_462kb_neg   | 8                          | 352                  | 2                |
| KOW_snf_cis_462kb_neg   | 7                          | 311                  | 2                |
| WTB_snf_cis_462kb_neg   | 13                         | 161                  | 8                |
| WTW_snf_cis_462kb_neg   | 21                         | 305                  | 7                |
| KOB_RpS6_cis_3054kb     | 30                         | 217                  | 14               |
| KOW_RpS6_cis_3054kb     | 32                         | 158                  | 20               |
| WTB_RpS6_cis_3054kb     | 37                         | 255                  | 15               |
| WTW_RpS6_cis_3054kb     | 58                         | 259                  | 22               |
| KOB_RpS6_cis_2997kb_neg | 14                         | 226                  | 6                |
| KOW_RpS6_cis_2997kb_neg | 16                         | 226                  | 7                |
| WTB_RpS6_cis_2997kb_neg | 8                          | 317                  | 3                |
| WTW_RpS6_cis_2997kb_neg | 17                         | 293                  | 6                |
